# Supplementary material for: Are we underrating rare earths as an electrocatalyst? The effect of their substitution in palladium nanoparticles enhances the activity towards ethanol oxidation reaction
Source: Royal Society of Chemistry journal article supplement (doi:10.1039/c7ta07945a), 2017-01-01
Supplement: c7ta07945a1.pdf [file c7ta07945a1.pdf]

**<sup>1</sup>Supplementary Information for**

**Are We Underrating Rare-Earth as an Electrocatalyst?- The  
Effect of their Substitution in Palladium Nanoparticles Enhances  
the Activity towards Ethanol Oxidation Reaction**

**Saurav Ch. Sarma, Udumula Subbarao, Yatish Khulbe, Rajkumar Jana and  
Sebastian C. Peter\***

New Chemistry Unit, Jawaharlal Nehru Centre for Advanced Scientific Research, Jakkur,  
Bangalore-560064, India.

**\*Corresponding author: [sebastiancp@jncasr.ac.in](mailto:sebastiancp@jncasr.ac.in). Phone: 080-22082998, Fax: 080-  
22082627**

## Tables

**Table S1.** The table shown lists the particle size of the catalysts determined from Scherrer's equation.

| Catalyst    | FWHM     | Theta (in angle) | cos (theta) | Particle Size (nm) |
|-------------|----------|------------------|-------------|--------------------|
| <b>YbPd</b> | 0.26492  | 20.046           | 0.939371629 | 31.9               |
| <b>EuPd</b> | 0.22503  | 20.043           | 0.939389589 | 37.6               |
| <b>NiPd</b> | 0.22532  | 20.118           | 0.93893982  | 37.5               |
| <b>CrPd</b> | 0.341662 | 20.018           | 0.939539154 | 24.7               |
| <b>YbPt</b> | 0.38209  | 19.8865          | 0.940322919 | 22.1               |
| <b>EuPt</b> | 0.37139  | 19.798           | 0.940847606 | 22.7               |

**Table S2.** The table shown lists the average atomic percentage and average weight percentage of the catalyst obtained from the EDAX measurements.

| Catalyst    | Average At %       | Average Wt%        |
|-------------|--------------------|--------------------|
| <b>YbPd</b> | Yb=7.4%, Pd=92.6%  | Yb=11.5%, Pd=88.5% |
| <b>EuPd</b> | Eu=12.6%, Pd=87.4% | Eu=16.1%, Pd=83.9% |
| <b>YbPt</b> | Yb=11.7%, Pt=88.3% | Yb=10.5%, Pt=89.5% |
| <b>EuPt</b> | Eu=10.8%, Pt=89.2% | Eu=8.6%, Pt=91.4%  |
| <b>NiPd</b> | Ni=11.2%, Pd=88.8% | Ni=6.5%, Pd=93.5%  |
| <b>CrPd</b> | Cr=7.1%, Pd=92.9%  | Cr=3.5%, Pd=96.5%  |

**Table S3.** The table shown lists the average weight percentage of the catalyst obtained from the ICP-OES measurements.

| Catalyst    | Composition  |      |
|-------------|--------------|------|
|             | <i>RE/TM</i> | Pd   |
| <b>YbPd</b> | 11.2         | 88.8 |
| <b>EuPd</b> | 14.8         | 85.2 |
| <b>NiPd</b> | 16.7         | 83.3 |
| <b>CrPd</b> | 13.5         | 86.5 |

**Table S4.** The table shown lists the ECSA value of the catalyst normalized with respect to Pd loading.

| Catalysts            | EASA (m <sup>2</sup> /gm <sub>Pd</sub> ) |
|----------------------|------------------------------------------|
| <b>Pd/C (20 wt%)</b> | 66.2                                     |
| <b>YbPd</b>          | 11.4                                     |

|             |      |
|-------------|------|
| <b>EuPd</b> | 13.5 |
| <b>NiPd</b> | 13.3 |
| <b>CrPd</b> | 1.57 |

**Table S5.** *d*-band center of the catalyst, with adsorbed intermediates, as a descriptor for strength of adsorption of intermediates. The value in parenthesis denoted the *d*-band center of the catalyst before the adsorption of intermediates.

| <b>Catalysts</b> | <b>COCH<sub>3</sub> (eV)</b> | <b>OH (eV)</b> |
|------------------|------------------------------|----------------|
| <b>Pd (111)</b>  | -3.15 (-2.14)                | -2.76 (-2.14)  |
| <b>YbPd</b>      | -2.83 (-2.19)                | -2.91 (-2.88)  |
| <b>NiPd</b>      | -2.79 (-2.59)                | -2.69 (-2.31)  |
| <b>CrPd</b>      | -2.94 (-2.29)                | -2.38 (-1.95)  |

## Figures

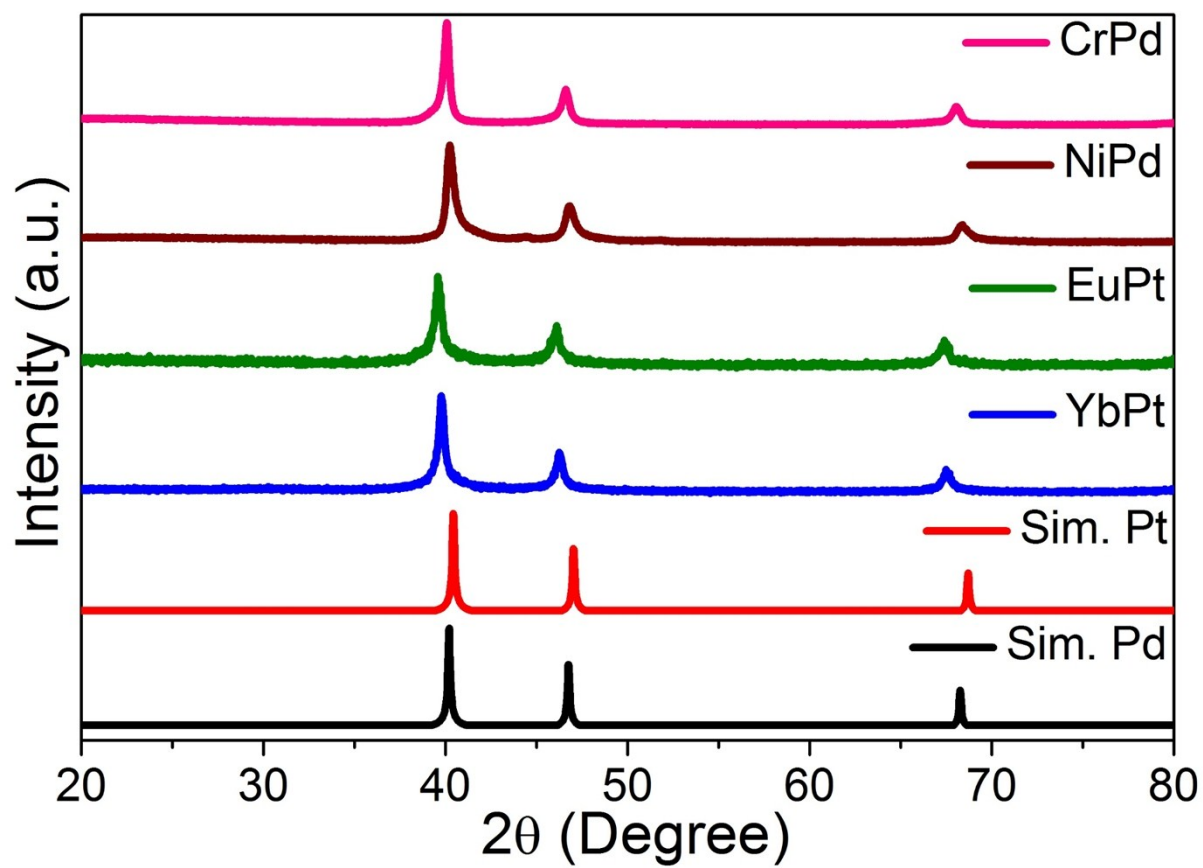

**Figure S1.** Comparison of experimental PXRD pattern of CrPd, NiPd, EuPt, YbPt with simulated patterns of Pd and Pt.

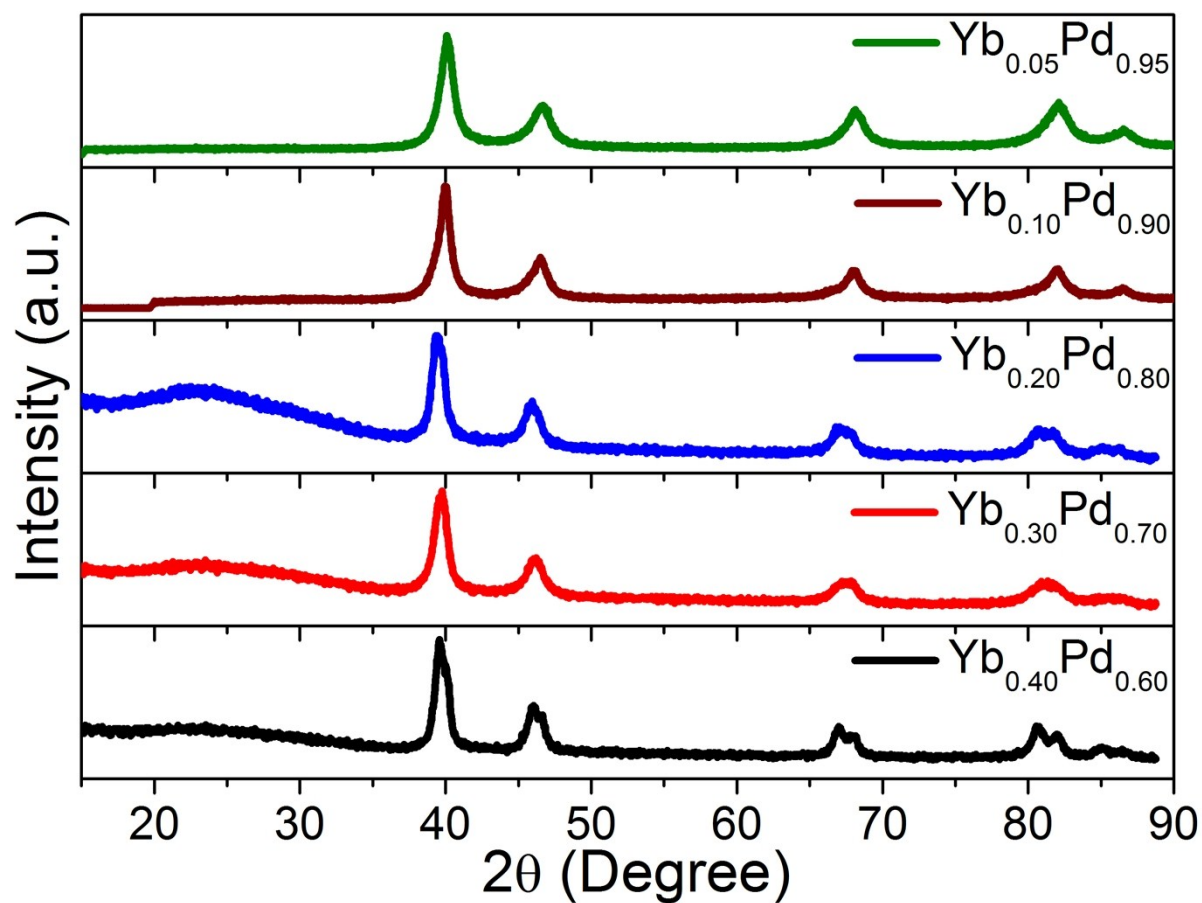

**Figure S2.** Comparison of the PXR D pattern of  $\text{Yb}_{0.05}\text{Pd}_{0.95}$ ,  $\text{Yb}_{0.10}\text{Pd}_{0.90}$ ,  $\text{Yb}_{0.20}\text{Pd}_{0.80}$ ,  $\text{Yb}_{0.30}\text{Pd}_{0.70}$  and  $\text{Yb}_{0.40}\text{Pd}_{0.60}$ .

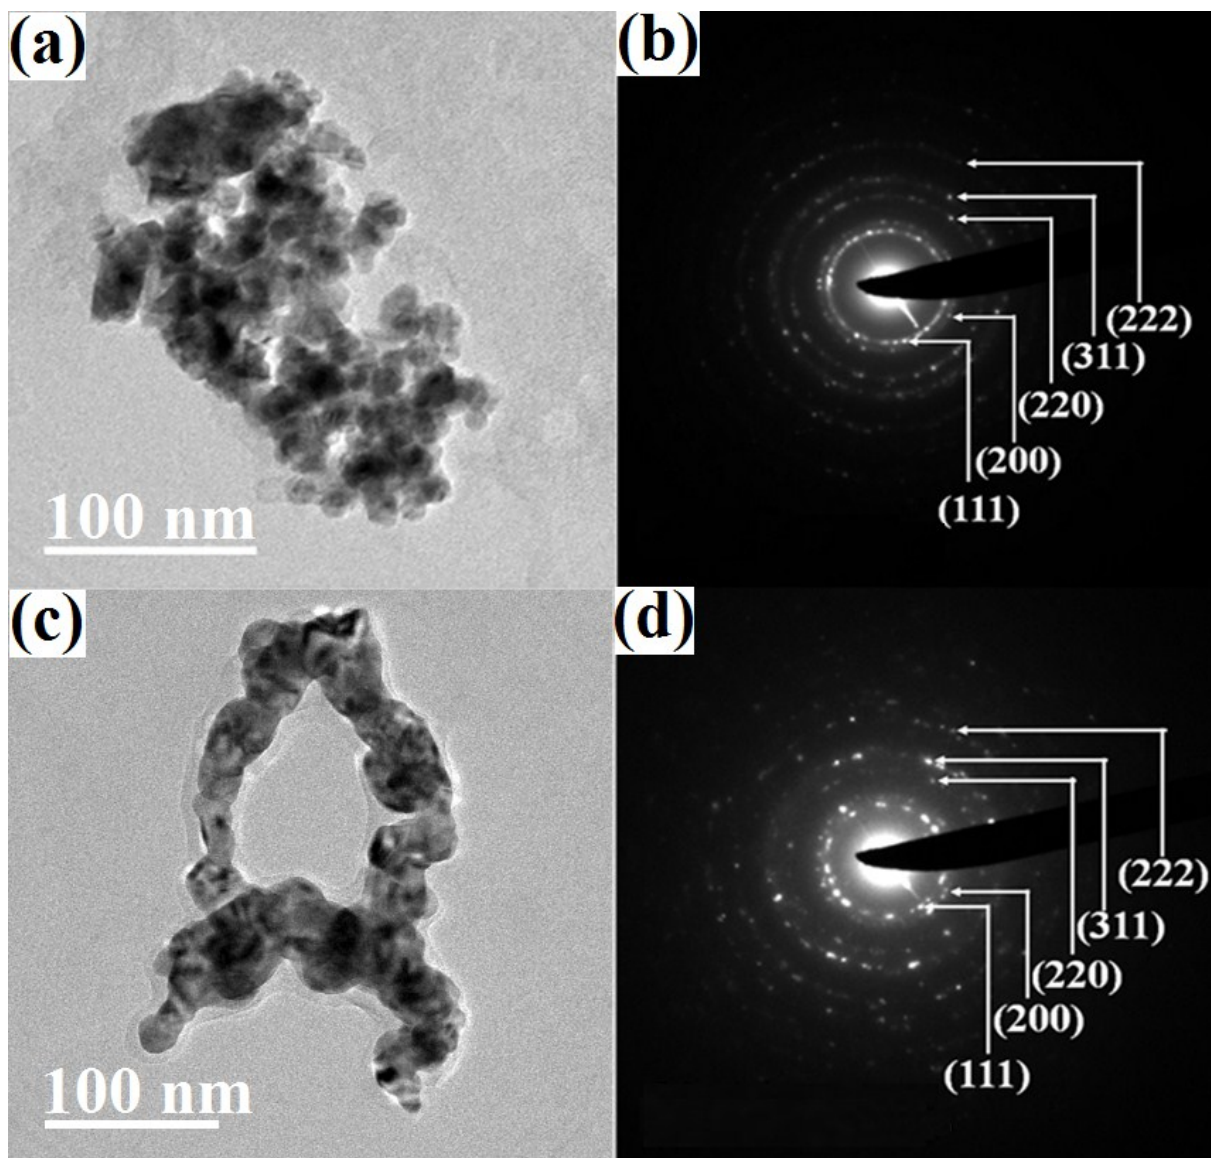

**Figure S3.** TEM images of (a) CrPd and (c) NiPd and corresponding SAED pattern of (b) CrPd and (d) NiPd.

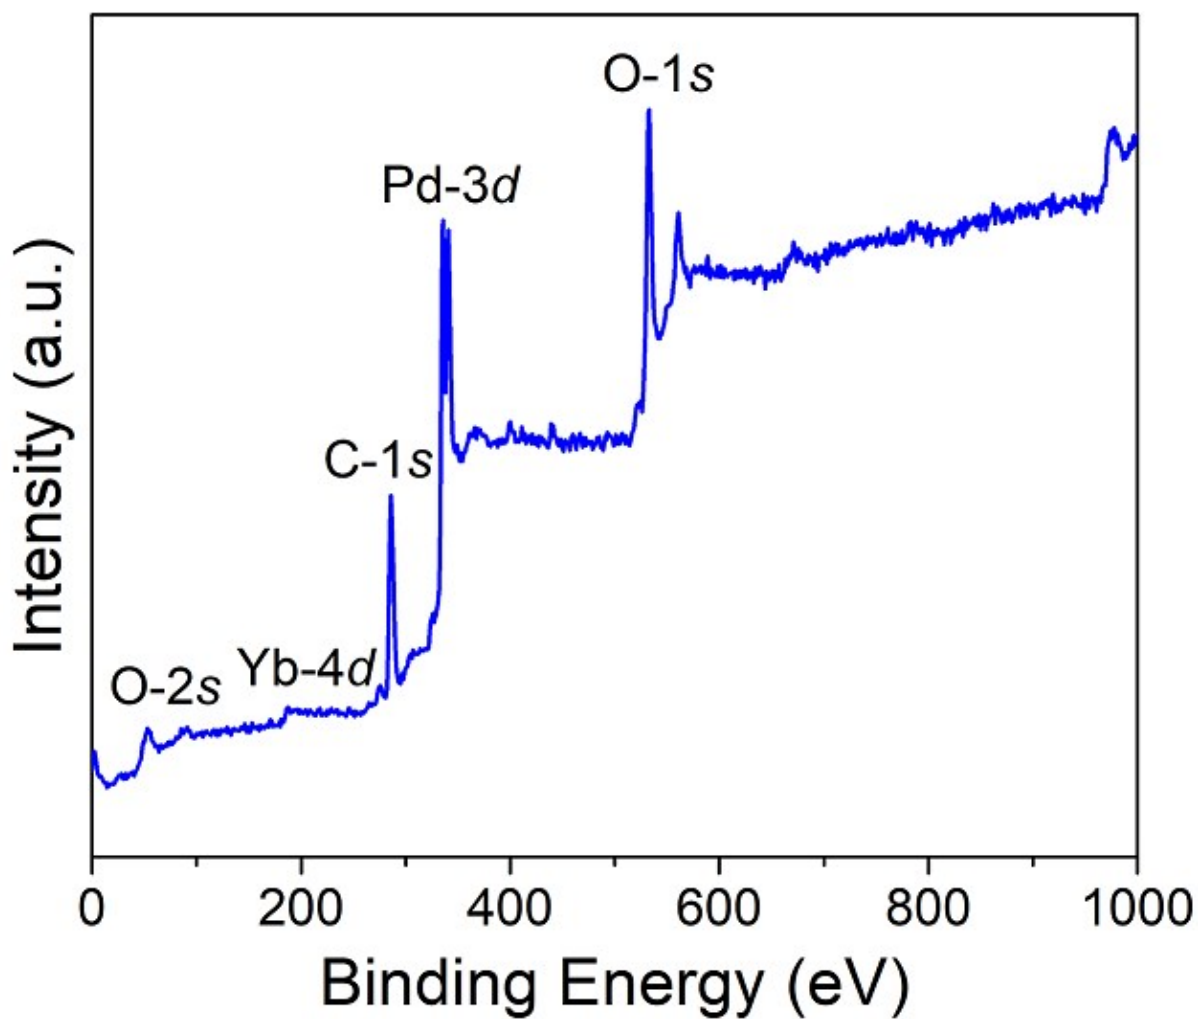

**Figure S4.** Survey XPS spectra of YbPd showing the presence of Yb, Pd and O and absence of Cl.

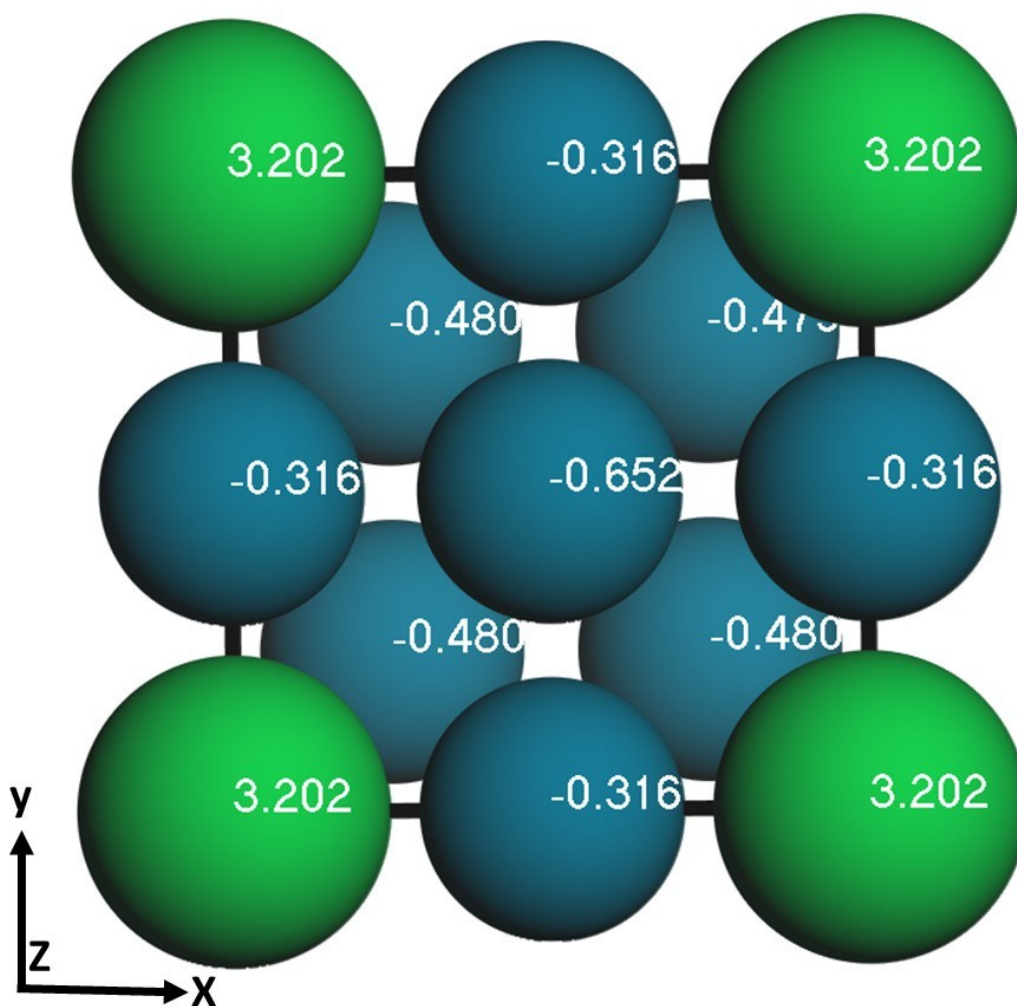

**Figure S5.** Mulliken charge analysis showing approximately +3 and -0.3 oxidation states of Yb and Pd, respectively. Text on each atom indicates the corresponding charge on the atom. Green and blue atoms corresponds to Yb and Pd, respectively.



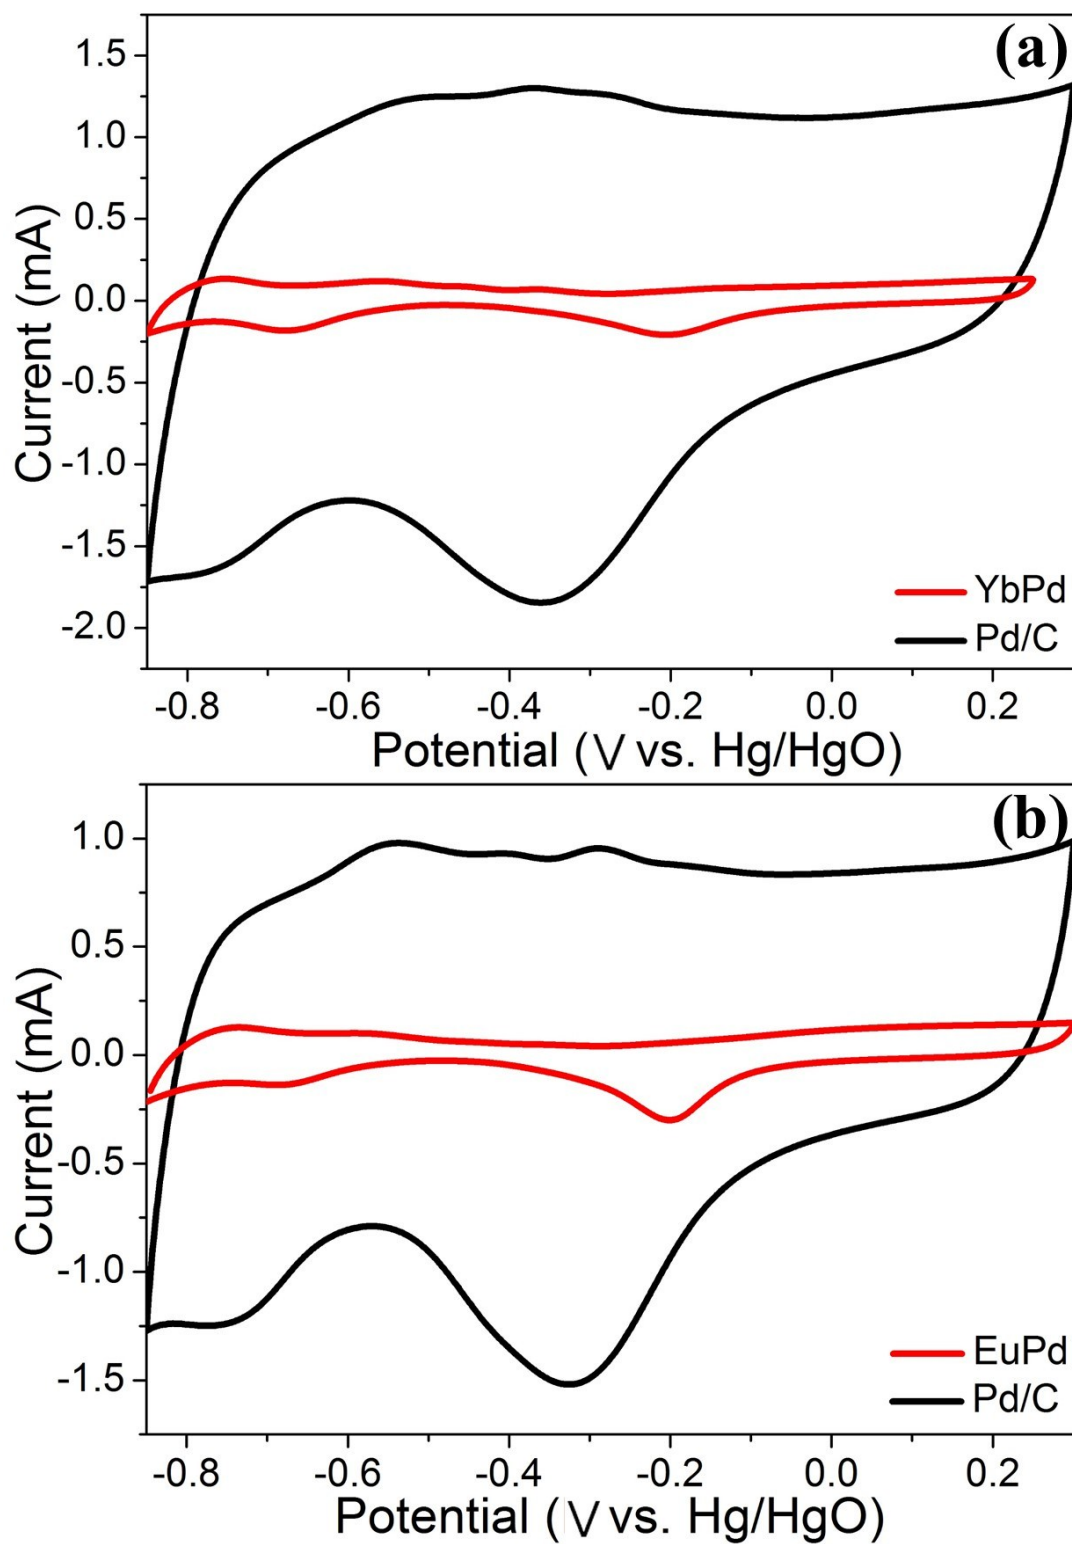

**Figure S6.** The comparison of the cyclic voltammogram of (a) YbPd and (b) EuPd in  $N_2$  saturated 0.5 M KOH measured at a sweep rate of 50 mV/sec with commercially available Pd/C (20 wt%).

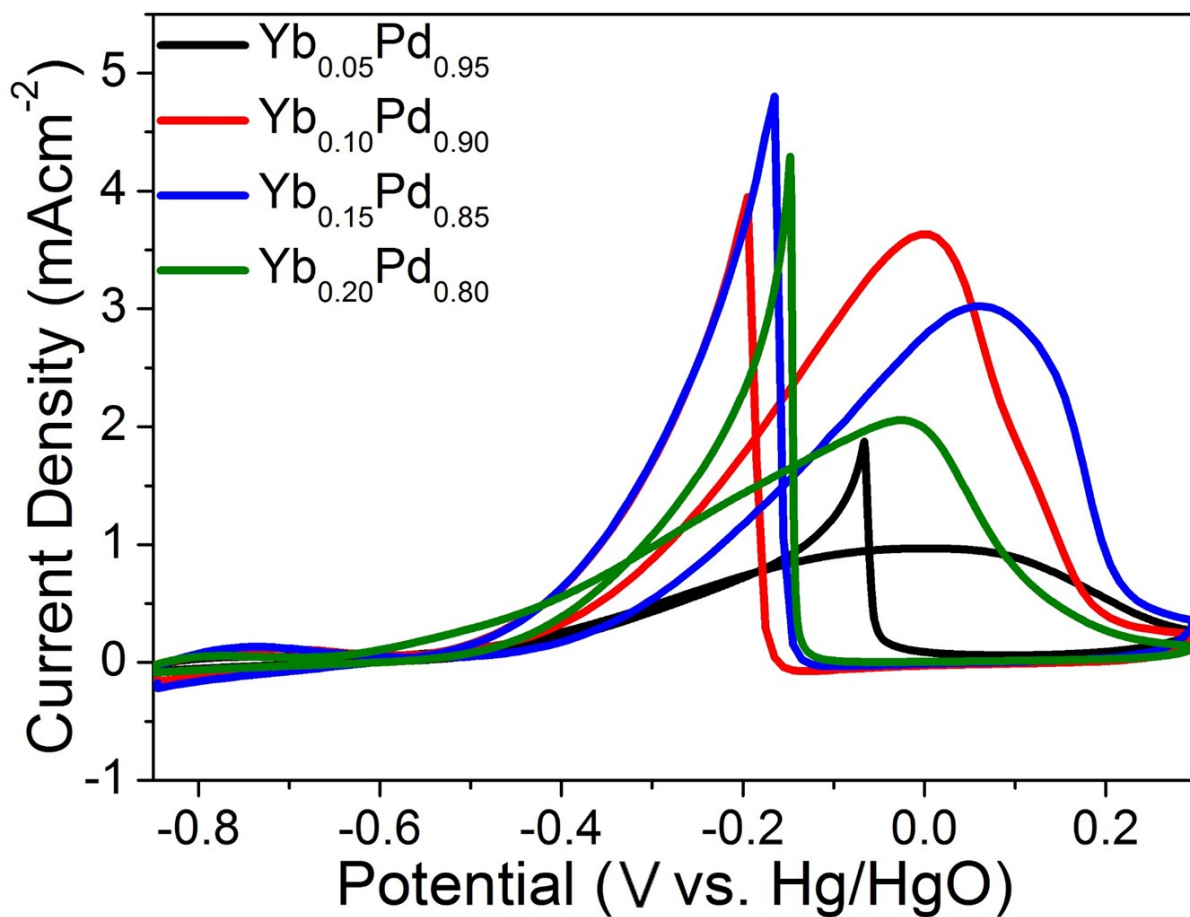

**Figure S7.** The comparison of the EOR specific activity of Yb<sub>0.05</sub>Pd<sub>0.95</sub>, Yb<sub>0.10</sub>Pd<sub>0.90</sub>, Yb<sub>0.15</sub>Pd<sub>0.95</sub> and Yb<sub>0.20</sub>Pd<sub>0.80</sub> in N<sub>2</sub> saturated 0.5 M KOH measured at a sweep rate of 50 mV/sec.

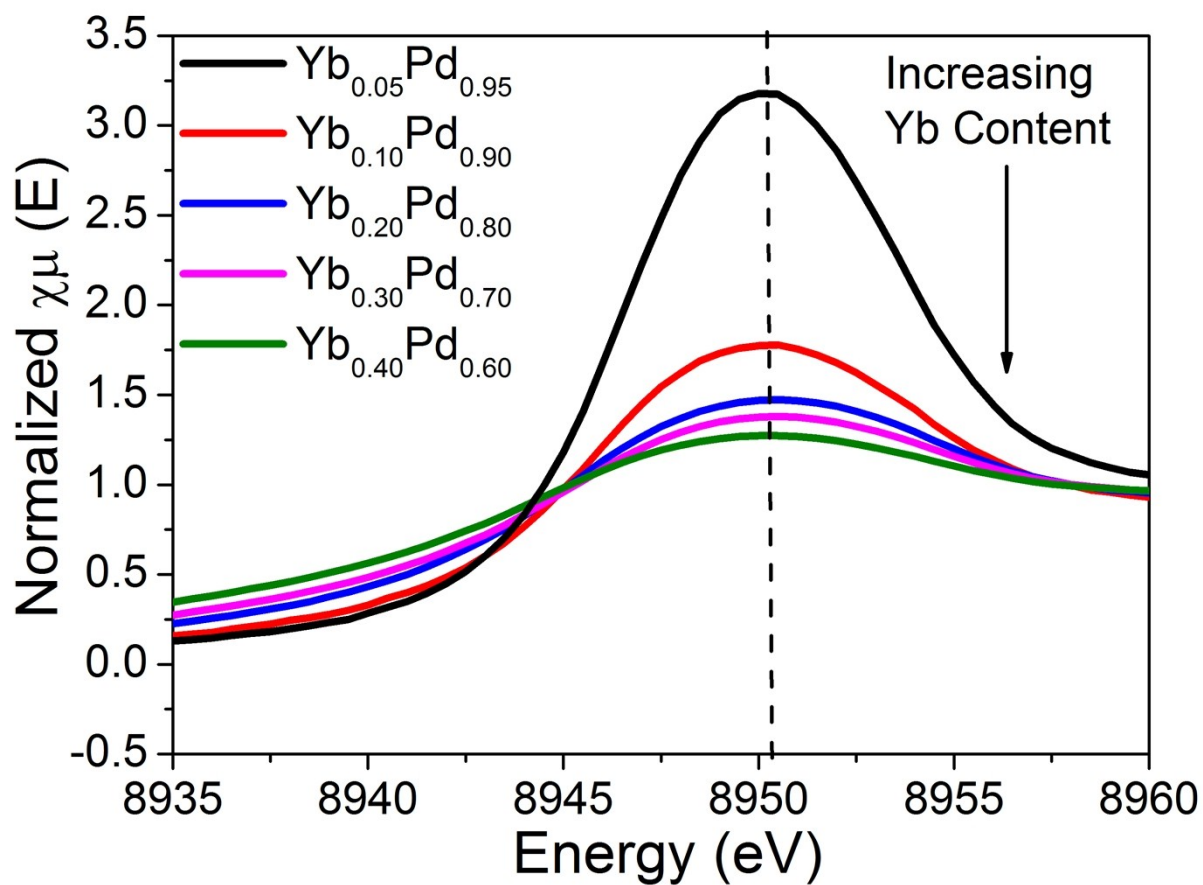

**Figure S8.** Comparison of white line intensity of Yb<sub>0.05</sub>Pd<sub>0.95</sub>, Yb<sub>0.10</sub>Pd<sub>0.90</sub>, Yb<sub>0.20</sub>Pd<sub>0.80</sub>, Yb<sub>0.30</sub>Pd<sub>0.70</sub> and Yb<sub>0.40</sub>Pd<sub>0.60</sub> measured at Yb  $L_{III}$  edge.
